# Supplementary material for: Robust charge spatial separation and linearly tunable band gap of low-energy tube-edge phosphorene nanoribbon
Source: Royal Society of Chemistry journal article supplement (doi:10.1039/d1na00332a), 2021-01-01
Supplement: d1na00332a1.pdf [file d1na00332a1.pdf]

## **Robust Charge Spatial Separation and Tunable Band Gap of Low-Energy Tube-Reconstructed Phosphorene Edges**

Mingyue XIA<sup>1</sup>, Hongsheng Liu<sup>1</sup>, Lu Wang<sup>2</sup>, ShiQi LI<sup>1</sup>, Junfeng Gao<sup>1\*</sup>, Yan Su<sup>1\*</sup>,  
Jijun Zhao<sup>1</sup>

*1. Key laboratory of Material Modification by Laser, Ion and Electron Beams  
(Dalian University of Technology), Ministry of Education, Dalian, 116024, China*

*2. Institute of Functional Nano & Soft Materials (FUNSOM), Jiangsu Key  
Laboratory for Carbon-Based Functional Materials & Devices, Soochow University,  
Suzhou, Jiangsu 215123, China*

Email: [gaojf@dlut.edu.cn](mailto:gaojf@dlut.edu.cn); [su.yan@dlut.edu.cn](mailto:su.yan@dlut.edu.cn)

## CALCULATION DETAILS

Our DFT calculations were carried out by the VASP code<sup>1</sup>, using the planewave basis with an energy cutoff of 460 eV, the projector augmented wave pseudopotentials<sup>2</sup>, and the generalized gradient approximation parameterized by Perdew-Burke-Ernzerhof (GGA-PBE)<sup>3</sup> for exchange-correlation functional. The Brillouin zones of the supercells were sampled by  $10 \times 1 \times 1$  uniform k point mesh. A 15 Å vacuum layer is provided along the non-periodic direction to prevent periodic boundary conditions from affecting the structure. With fixed cell parameters, the model structures were fully optimized using the convergence criteria of  $10^{-5}$  eV for the electronic energy and  $10^{-2}$  eV/Å for the forces on each atom.

*Ab initio* molecular dynamics (AIMD) simulations were carried out to estimate thermal stability. The AIMD simulations were performed at 300 K, and simulation time is from 5 ps to 9 ps, using NVT ensemble with the Nose' thermostat<sup>4</sup> 1 fs/step.

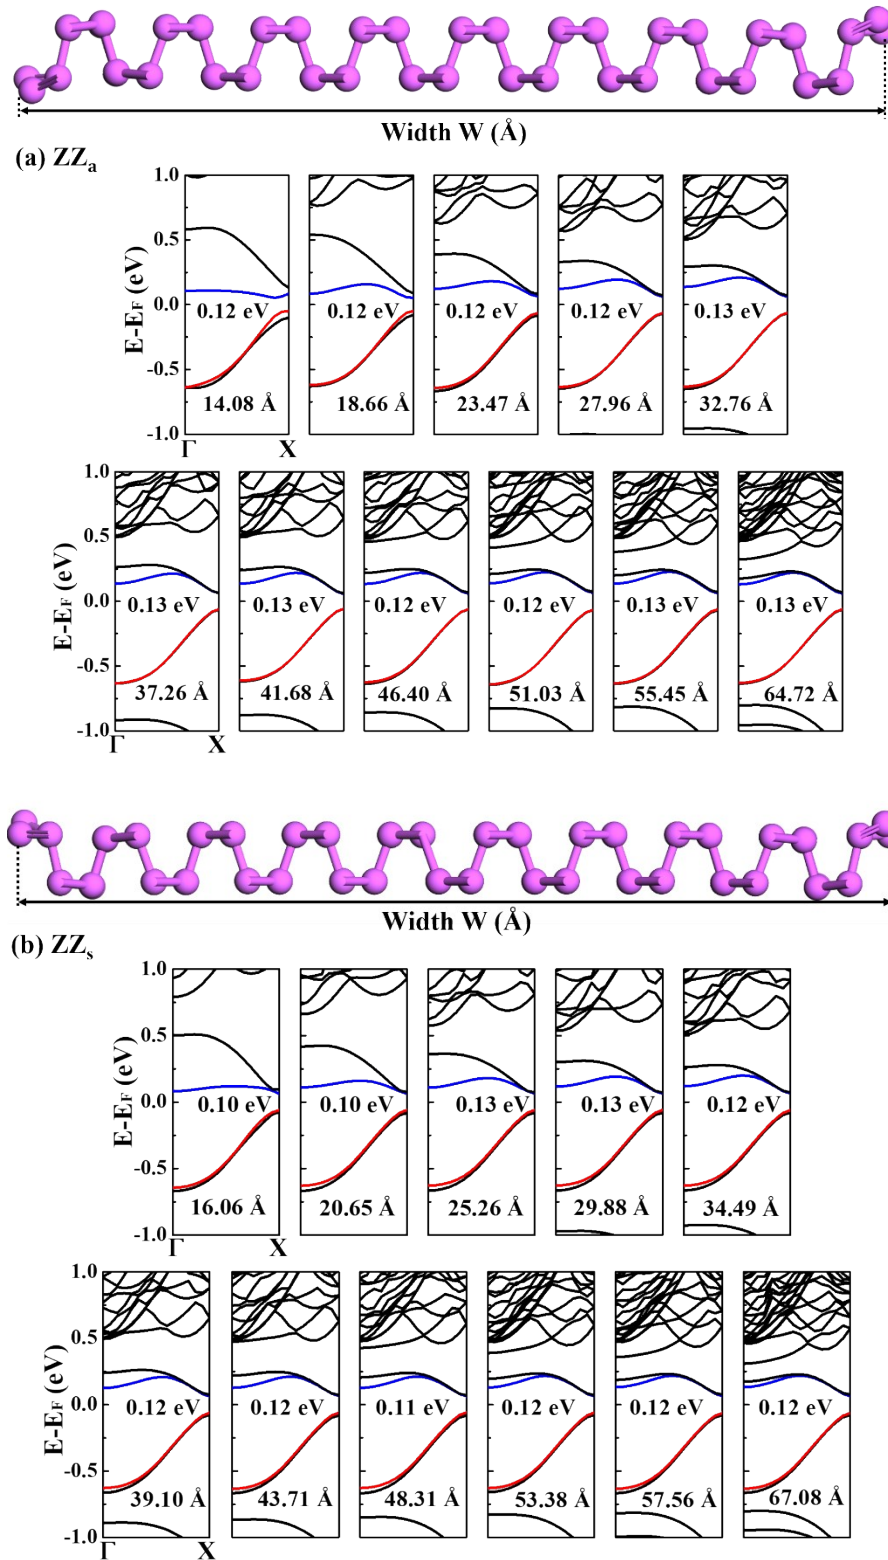

**Figure S1.** Band structures of ZZ PNRs with different widths with asymmetric (a) and symmetric (b) edges.

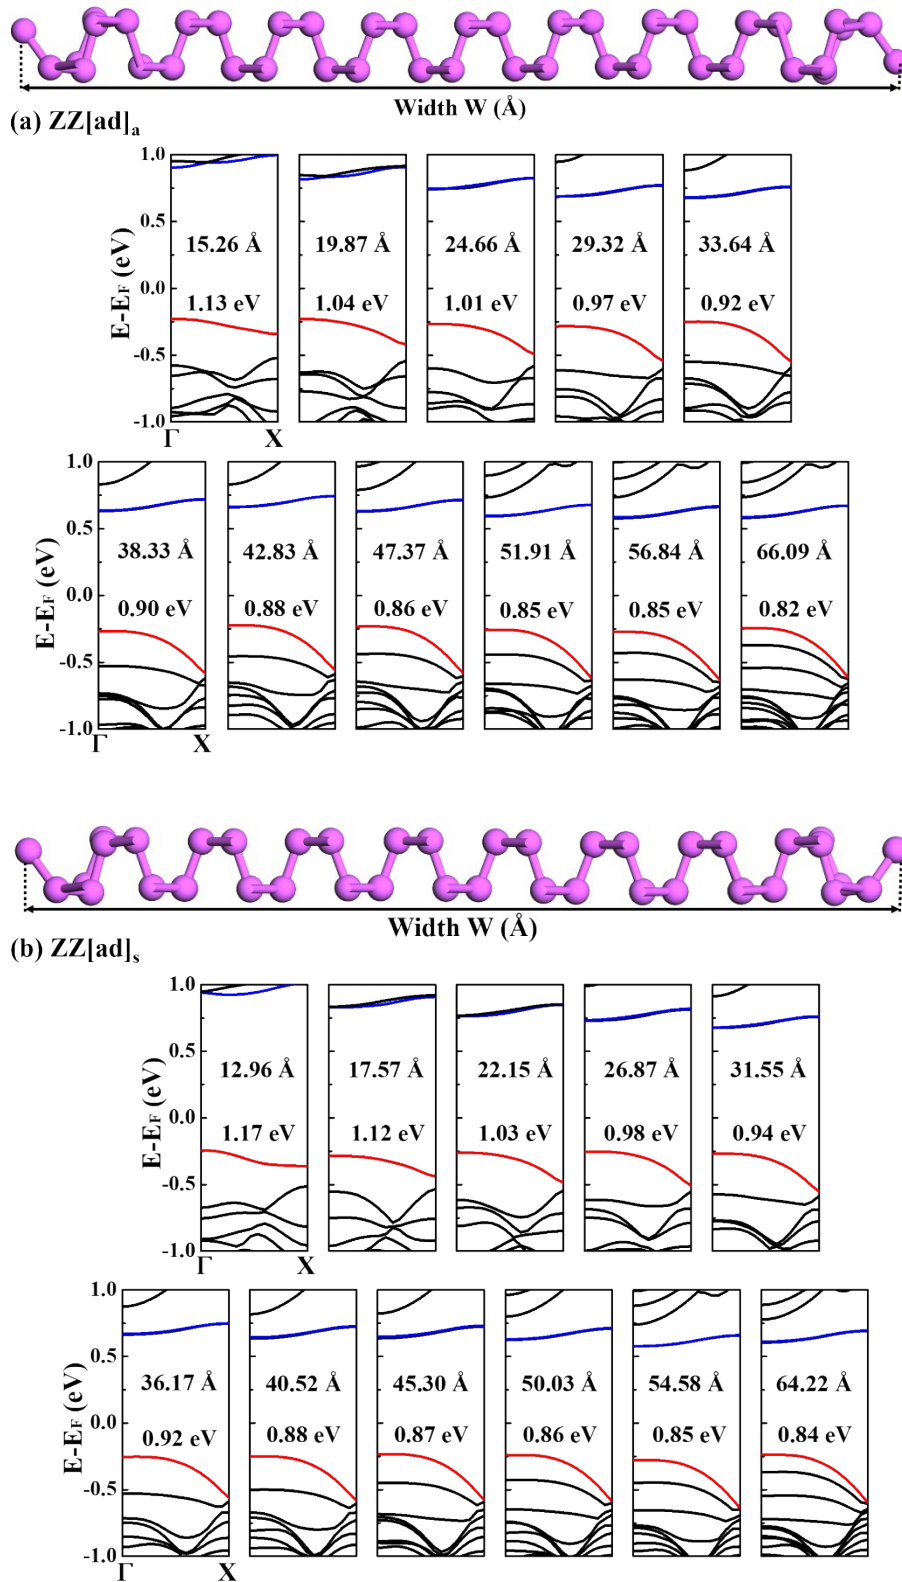

**Figure S2.** Band structures of ZZ[ad] PNRs with different widths with asymmetric (a) and symmetric (b) edges.

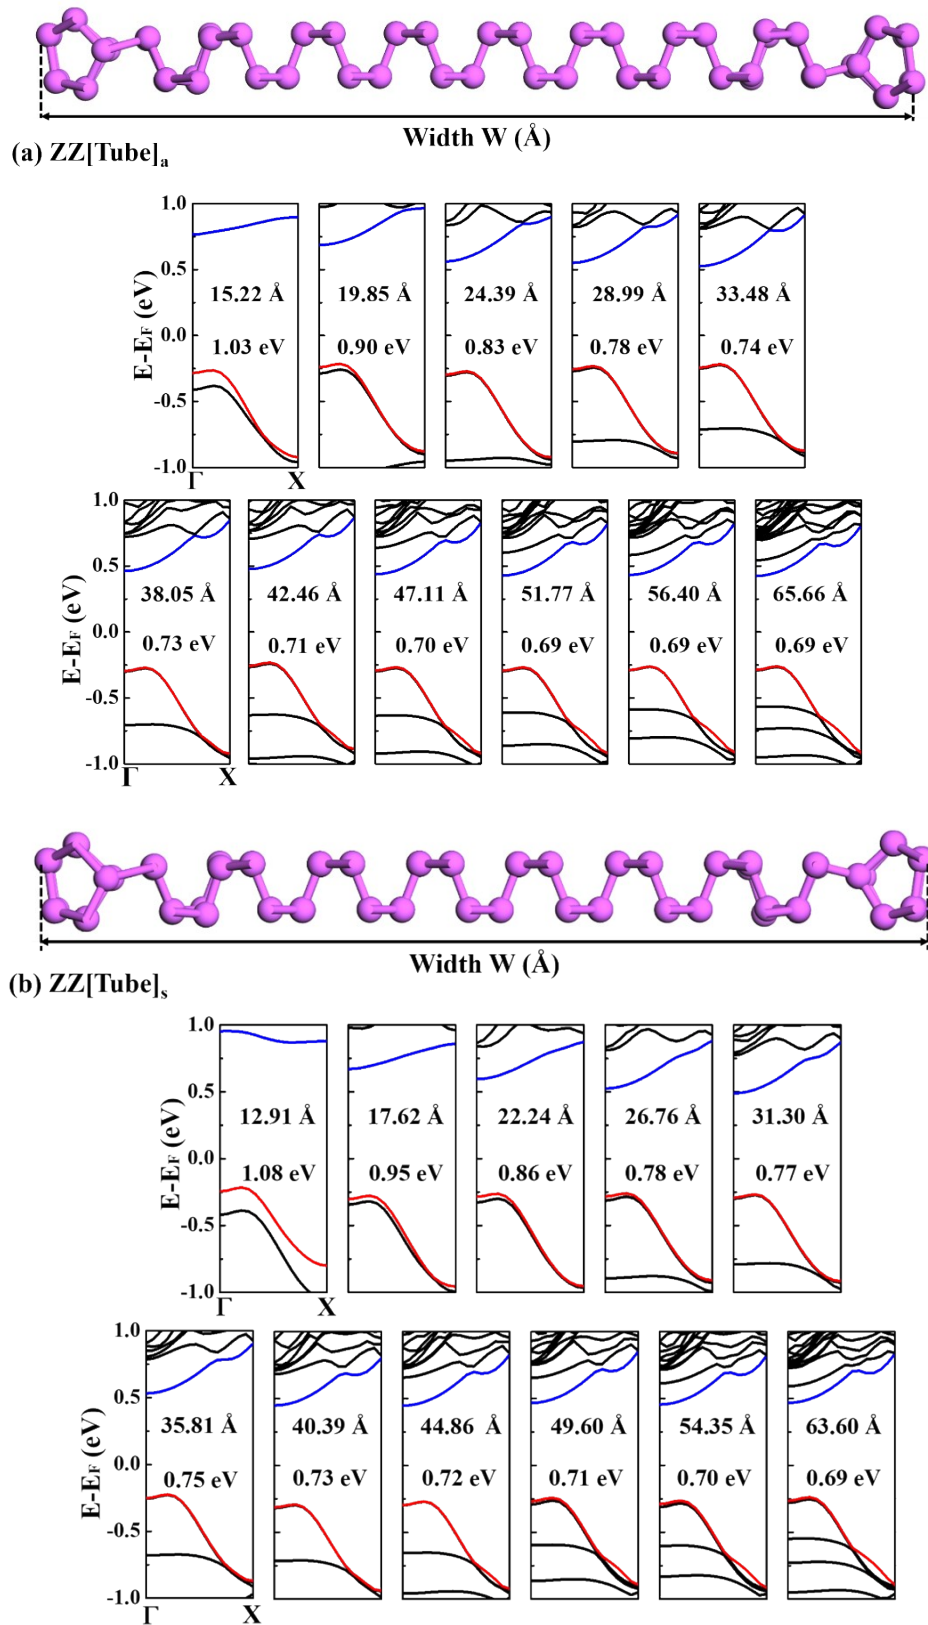

**Figure S3.** Band structures of ZZ[Tube] PNRs with different widths with asymmetric (a) and symmetric (b) edges.

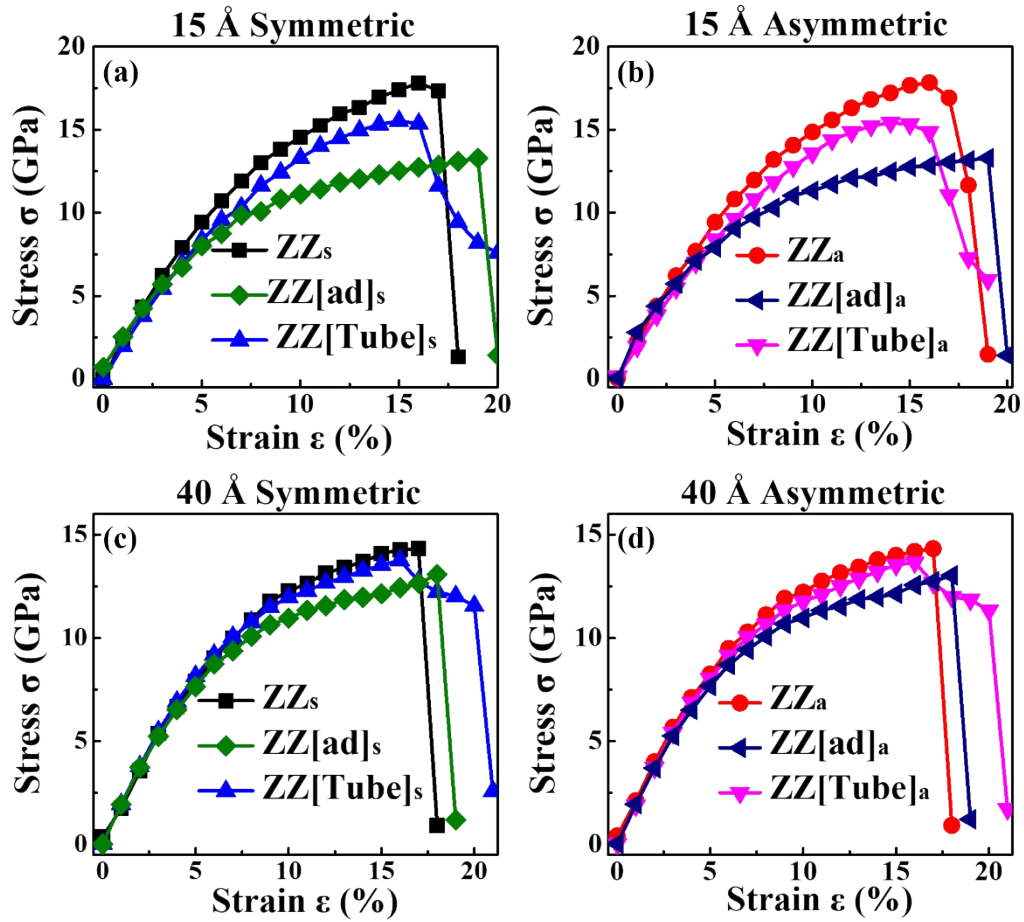

**Figure S4.** The stress–strain curves for ZZ, ZZ[ad] and ZZ[Tube] PNRs with either symmetric or asymmetric edges with different width.

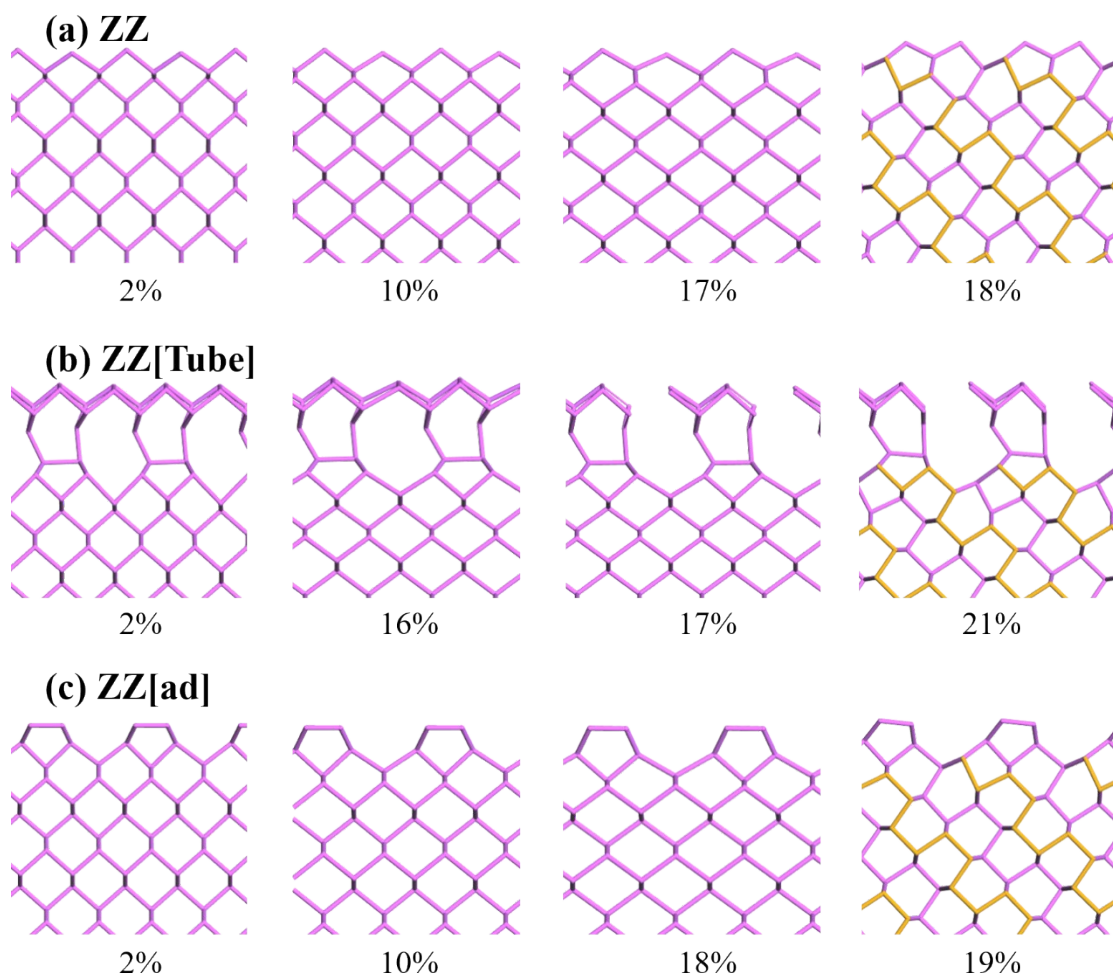

**Figure S5.** The structural deformation of ZZ, ZZ[Tube] and ZZ[ad] PNRs with asymmetric edges during stretching. The last column represents the failure at the critical tensile strain. The ZZ[Tube] fractured for the first time when the applied strain was 17%, and the phase transition occurred at 21%, causing the second fracture.

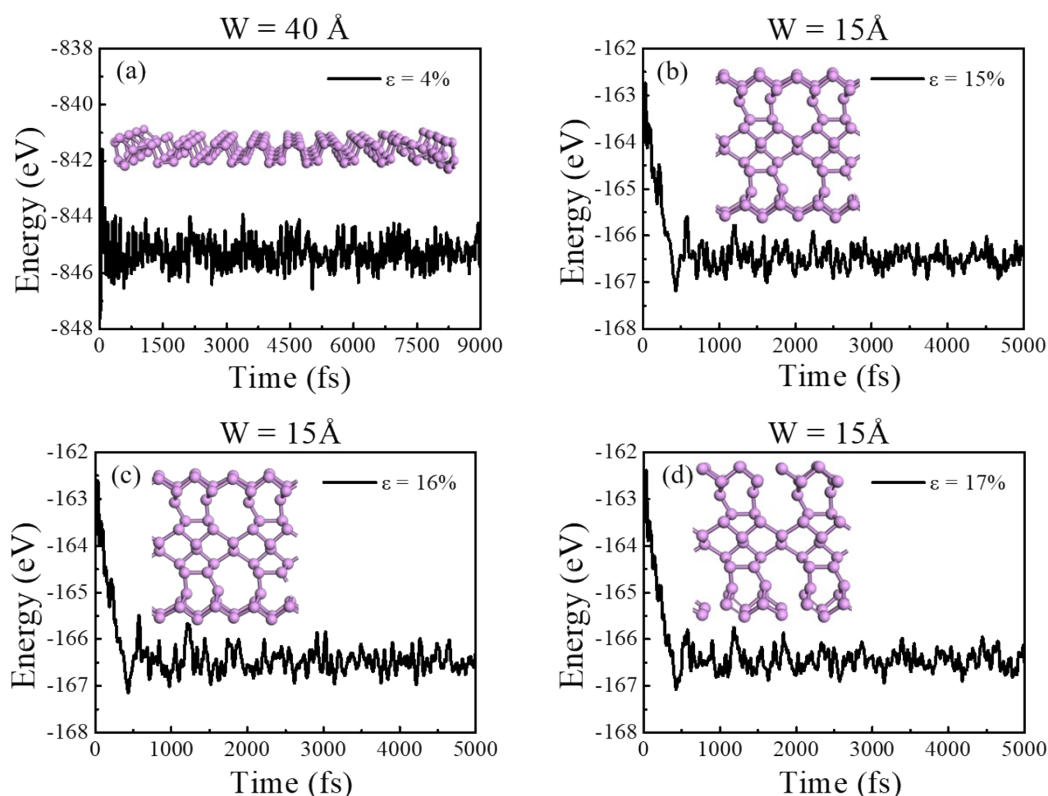

**Figure S6.** Equilibrated structure of the ZZ[Tube] PNRs and fluctuations of total energy as a function of simulation time in AIMD simulations at 300 K. (a)ZZ[Tube] PNRs with the width of 40Å, fluctuations of total energy as a function of simulation time under strain at 4%. (b)-(d) representing under strain at 15%, 16% and 17%, ZZ[Tube] PNRs with the width of 40Å, fluctuations of total energy as a function of simulation time.

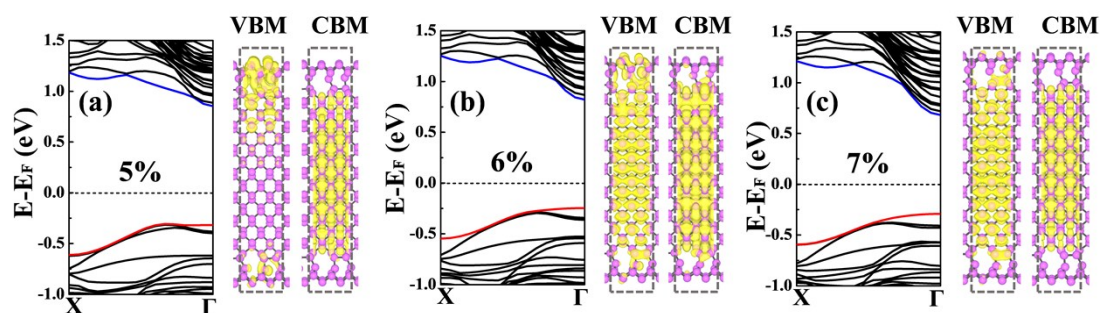

**Figure S7.** Electronic band structures of ZZ[Tube] PNRs with a width of 40 Å under strain of 5% ,6% and 7% (isosurface level =  $1.2 \times 10^{-5}$  |e|/bohr<sup>3</sup>) (a-c). The VBM and CBM are high-lighted by red and blue, respectively.



## References

1. G. Kresse, *Phys. Rev. B*, 1996, **54**, 11169.
2. P. E. Blochl, *Phys Rev B Condens Matter*, 1994, **50**, 17953-17979.
3. J. P. Perdew, K. Burke and M. Ernzerhof, *Physical Review Letters*, 1996, **77**, 3865-3868.
4. S. Nosé, *The Journal of Chemical Physics*, 1984, **81**, 511-519.
